# Supplementary material for: Modeling Research Topics for Artificial Intelligence Applications in Medicine: Latent Dirichlet Allocation Application Study
Source: PubMed Central journal article supplement (PMC6858616; doi:10.2196/15511), 2019-11-01
Supplement: jmir_v21i11e15511_app2.pdf [file jmir_v21i11e15511_app2.pdf]

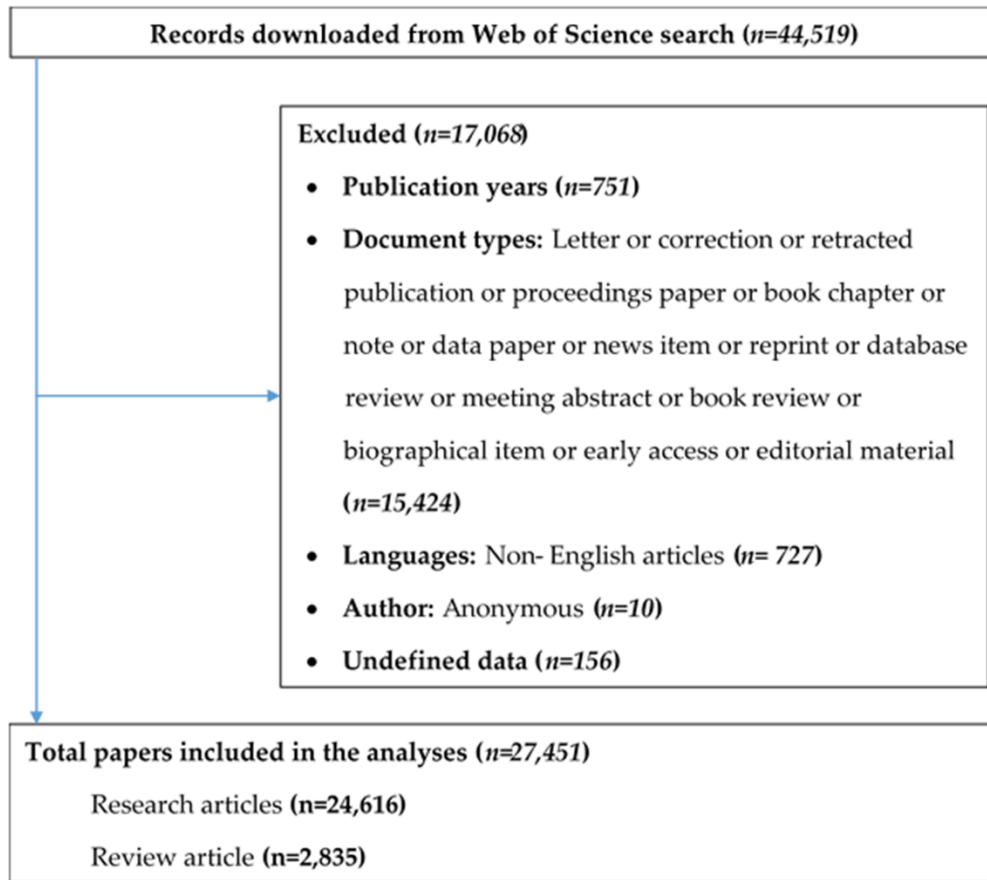

**Figure S1.** Selection of papers in the Web of Science database
