# Supplementary material for: Modeling Research Topics for Artificial Intelligence Applications in Medicine: Latent Dirichlet Allocation Application Study
Source: PubMed Central journal article supplement (PMC6858616; doi:10.2196/15511), 2019-11-01
Supplement: jmir_v21i11e15511_app3.pdf [file jmir_v21i11e15511_app3.pdf]

Table S2. The WOS research areas constructing LDA research topics (Topics 1-3)

|    | Category                         | Topic 1 | Category                               | Topic 2 | Category                               | Topic 3 |
|----|----------------------------------|---------|----------------------------------------|---------|----------------------------------------|---------|
| No | Total                            | 4,349   | Total                                  | 3,662   | Total                                  | 2,838   |
| 1  | Surgery                          | 37.3%   | Computer Science,<br>Artificial        | 21.0%   | Computer Science,<br>Artificial        | 6.1%    |
| 2  | Urology & Nephrology             | 27.7%   | Engineering, Electrical                | 13.8%   | Computer Science,<br>Information       | 5.3%    |
| 3  | Oncology                         | 14.2%   | Computer Science,<br>Interdisciplinary | 12.7%   | Medical Informatics                    | 4.5%    |
| 4  | Obstetrics & Gynecology          | 10.3%   | Engineering, Biomedicine               | 11.6%   | Engineering, Electrical                | 4.0%    |
| 5  | Otorhinolaryngology              | 5.7%    | Medical Informatics                    | 9.9%    | Health Care Sciences                   | 3.8%    |
| 6  | Gastroenterology &<br>Hepatology | 4.8%    | Computer Science,<br>Information       | 7.7%    | Computer Science,<br>Interdisciplinary | 3.3%    |
| 7  | Cardiac & Cardiovascular         | 4.5%    | Mathematical &<br>Computational        | 6.8%    | Surgery                                | 3.1%    |
| 8  | Respiratory System               | 3.0%    | Computer Science,<br>Theory            | 5.5%    | Engineering, Biomedicine               | 3.0%    |
| 9  | Medicine, General & Internal     | 3.0%    | Operations Research &<br>Management    | 4.9%    | Robotics                               | 3.0%    |
| 10 | Radiology, Nuclear Medicine      | 1.7%    | Instruments &<br>Instrumentation       | 4.3%    | Computer Science,<br>Theory            | 2.7%    |
