# Supplementary material for: Modeling Research Topics for Artificial Intelligence Applications in Medicine: Latent Dirichlet Allocation Application Study
Source: PubMed Central journal article supplement (PMC6858616; doi:10.2196/15511), 2019-11-01
Supplement: jmir_v21i11e15511_app4.pdf [file jmir_v21i11e15511_app4.pdf]

Table S3. The WOS research areas constructing LDA research topics (Topics 4-6)

|    | Category                             | Topic 4 | Category                             | Topic 5 | Category                             | Topic 6 |
|----|--------------------------------------|---------|--------------------------------------|---------|--------------------------------------|---------|
| No | Total                                | 2,182   | Total                                | 2,089   | Total                                | 2,062   |
| 1  | Computer Science, Artificial         | 11.0%   | Biochemical Research                 | 8.5%    | Radiology, Nuclear Medicine          | 8.9%    |
| 2  | Engineering, Biomedical              | 5.5%    | Mathematical & Computational Biology | 6.7%    | Engineering, Biomedicine             | 7.1%    |
| 3  | Engineering, Chemical                | 5.1%    | Biotechnology & Applied Microbiology | 6.5%    | Robotics                             | 6.5%    |
| 4  | Water Resources                      | 4.5%    | Biochemistry & Molecular biology     | 5.8%    | Surgery                              | 6.1%    |
| 5  | Chemistry, Analytical                | 3.5%    | Multidisciplinary Science            | 5.5%    | Engineering, Electrical              | 4.4%    |
| 6  | Medical Informatics                  | 2.6%    | Genetics & Heredity                  | 4.6%    | Materials Science, Multidisciplinary | 4.1%    |
| 7  | Materials Science, Multidisciplinary | 2.6%    | Computer Science, Interdisciplinary  | 3.9%    | Automation & Control                 | 3.2%    |
| 8  | Computer Science, Interdisciplinary  | 2.4%    | Chemistry, Multidisciplinary         | 3.3%    | Engineering, Mechanic                | 3.0%    |
| 9  | Engineering, Civil                   | 2.1%    | Chemistry, Medicinal                 | 3.3%    | Oncology                             | 2.9%    |
| 10 | Chemistry, Multidisciplinary         | 2.0%    | Pharmacology & Pharmacy              | 3.0%    | Instruments & Instrumentation        | 2.6%    |
