# Supplementary material for: Modeling Research Topics for Artificial Intelligence Applications in Medicine: Latent Dirichlet Allocation Application Study
Source: PubMed Central journal article supplement (PMC6858616; doi:10.2196/15511), 2019-11-01
Supplement: jmir_v21i11e15511_app5.pdf [file jmir_v21i11e15511_app5.pdf]

Table S4. The WOS research areas constructing LDA research topics (Topics 7-10)

|    | Category                                  | Topic 7 | Category                            | Topic 8 | Category                     | Topic 9 | Category                             | Topic 10 |
|----|-------------------------------------------|---------|-------------------------------------|---------|------------------------------|---------|--------------------------------------|----------|
| No | Total                                     | 2,008   | Total                               | 1,922   | Total                        | 1,564   | Total                                | 1,350    |
| 1  | Radiology, Nuclear Medicine               | 13.7%   | Medical Informatics                 | 5.7%    | Rehabilitation               | 9.2%    | Medical Informatics                  | 14.2%    |
| 2  | Neurosciences                             | 7.6%    | Health Care Sciences                | 4.0%    | Neurosciences                | 8.6%    | Computer Science, Interdisciplinary  | 9.2%     |
| 3  | Engineering, Biomedicine                  | 7.1%    | Multidisciplinary Science           | 3.4%    | Engineering, Biomedicine     | 7.0%    | Computer Science, Information        | 8.4%     |
| 4  | Computer Science, Interdisciplinary       | 4.6%    | Medicine, General & Internal        | 2.9%    | Clinical Neurology           | 4.4%    | Health Care Sciences                 | 8.3%     |
| 5  | Neuroimaging                              | 3.2%    | Computer Science, Interdisciplinary | 2.9%    | Sport Sciences               | 3.0%    | Information Science & Library        | 4.7%     |
| 6  | Clinical Neurology                        | 3.2%    | Psychiatry                          | 2.8%    | Robotics                     | 2.4%    | Mathematical & Computational Biology | 3.2%     |
| 7  | Computer Science, Artificial intelligence | 3.2%    | Oncology                            | 2.5%    | Surgery                      | 1.7%    | Computer Science, Artificial         | 2.3%     |
| 8  | Engineering, Electric                     | 3.0%    | Engineering, Biomedicine            | 2.4%    | Multidisciplinary Science    | 1.7%    | Engineering, Biomedicine             | 1.6%     |
| 9  | Medical Informatics                       | 2.8%    | Urology & Nephrology                | 2.2%    | Medical Informatics          | 1.2%    | Biochemical Research                 | 1.2%     |
| 10 | Multidisciplinary Science                 | 2.7%    | Surgery                             | 2.2%    | Computer Science, Artificial | 1.2%    | Multidisciplinary Science            | 1.1%     |
